# Supplementary material
Source: publisher figshare collection journal article supplement (https://gsapubs.figshare.com/ndownloader/files/39634105)
Supplement: Supplementary file 1 [file 39634105]

## Sheet: KimbData_young_good
Sample	Aliquota	Lattitude	Longitude	Elevation (m)	Mass (mg)b	Rs (mm)c	4He (ncc)d	U (ppm)e	Th (ppm)e	Sm (ppm)e	eUf	Th/U	Uncorr Date (Ma)g	FT combh	Corrected Date (Ma)i	Corr Date Analytic Unc. (Ma)2sj	Date-eU Corr?k	Kimberlite name
SA11-56	ma2	-31.2833	22.5667	1428	19.8	65	0.1	0.1	0.6	7.6	0.2	6	63	0.78	80	1.2	No	Hebron
SA11-56	a5	-31.2833	22.5667	1428	7.9	72	1.8	0.3	14.4	169.6	3.6	56.4017	58	0.77	75	6	No	Hebron
SA11-56	ma1	-31.2833	22.5667	1428	18.1	61	1.2	0.9	13.9	6.6	4.2	15.4444	54	0.75	72	1.4	No	Hebron
SA11-56	a1	-31.2833	22.5667	1428	14.6	82	1.7	1.1	17.3	32	5.2	15.9059	42	0.82	52	3.2	No	Hebron
SA12-12	a2	-28.3708	24.6528	1156	2.46	49.32	6.358	5.11	51.41	0	17.2	10.0585	67.95	0.667	101.81	1.32	NA	Leicester
SA12-12	a3	-28.3708	24.6528	1156	12.05	82.35	7	1.25	109.75	0	27	87.8995	47.51	0.784	60.61	0.86	NA	Leicester
SA12-12	a1	-28.3708	24.6528	1156	10.4	72.42	11.757	13.74	86.33	0	34	6.28473	63.54	0.754	84.28	0.52	NA	Leicester
SA12-12	a5	-28.3708	24.6528	1156	1.84	41.35	15.241	28.18	129.66	0	58.6	4.60124	47.85	0.609	78.53	0.74	NA	Leicester
SA12-22	a1	-28.9891	28.6111	2545	1.35	42.34	3.643	5.76	35.2	33.53	14	6.115	46.89	0.608	77.17	4.3	No	Liqhobong
SA12-22	a4	-28.9891	28.6111	2545	1.01	38.77	4.892	7.82	29.45	33.29	14.7	3.763	59.97	0.623	96.19	6.8	No	Liqhobong
SA12-22	a3	-28.9891	28.6111	2545	2.27	49.89	4.439	7.14	34.17	35.06	15.2	4.789	52.89	0.686	77.12	3.52	No	Liqhobong
SA12-22	a2	-28.9891	28.6111	2545	2.47	52.41	10.229	17.75	50.23	45.43	29.5	2.831	62.95	0.709	88.77	3.86	No	Liqhobong
SA12-24	a1	-29.0036	28.8675	3051	2.68	53.26	2.097	6.52	0	0	6.5	0	59.38	0.713	83.25	2.06	No	Letseng-la-terai
SA12-24	a4	-29.0036	28.8675	3051	3.25	54.59	1.863	2.91	16.48	0	6.8	5.671	50.59	0.685	73.82	1.1	No	Letseng-la-terai
SA12-24	a5	-29.0036	28.8675	3051	15.33	94.26	2.372	6.78	1.39	0	7.1	0.205	61.58	0.836	73.64	0.82	No	Letseng-la-terai
SA12-24	a2	-29.0036	28.8675	3051	2.12	47.54	1.992	9.17	0	0	9.2	0	40.21	0.676	59.52	0.98	No	Letseng-la-terai
SA12-24	a2	-29.0036	28.8675	3051	3.69	59.94	2.998	10.4	0	0	10.4	0	53.26	0.746	71.37	1.46	No	Letseng-la-terai
SA12-24	a3	-29.0036	28.8675	3051	5.15	67.2	7.998	18.56	9.65	0	20.8	0.52	70.81	0.758	93.46	0.78	No	Letseng-la-terai
SA12-3	a5	-29.4168	24.9925	1199	6.589	71.031	2.581	4.115	14.687	14.686	7.567	3.569	61.816	0.757	81.64	1.16	No	Koffiefontein
SA12-3	a2	-29.4168	24.9925	1199	3.397	57.636	8.215	30.588	0	5.631	30.588	0	49.569	0.735	67.48	1.12	No	Koffiefontein
SA12-3	a1	-29.4168	24.9925	1199	1.437	42.646	9.6	33.649	0	10.53	33.649	0	52.587	0.648	81.15	1.5	No	Koffiefontein
SA12-3	a3	-29.4168	24.9925	1199	0.81	35.48	9.759	39.668	0	11.117	39.668	0	45.39	0.563	80.58	0.9	No	Koffiefontein
SA12-3	a4	-29.4168	24.9925	1199	4.805	62.39	18.942	55.663	2.608	9.419	56.276	0.047	62.057	0.754	82.3	4.34	No	Koffiefontein
SA12-4	a4	-29.396	24.981	1196	2.96	55.55	5.388	4.17	60.33	0	18.4	14.4568	53.95	0.709	76.04	0.7	NA	Klipfontein-07
SA12-4	a3	-29.396	24.981	1196	3.64	59.33	5.462	16.89	7.65	0	18.7	0.452919	53.97	0.745	72.42	0.96	NA	Klipfontein-07
SA12-4	a1	-29.396	24.981	1196	1.78	46.37	10.065	30.41	3.73	0	31.3	0.122504	59.39	0.662	89.79	1.7	NA	Klipfontein-07
SA12-4	a2	-29.396	24.981	1196	0.85	37	13.01	56.73	22.24	0	62	0.392045	38.83	0.625	62.12	0.78	NA	Klipfontein-07
SA13-1	a2	-29.7644	25.419	1413	1.767	45.657	4.484	7.577	12.78	5.425	10.581	1.687	77.679	0.665	116.82	4.84	No	Jagersfontein
SA13-1	a5	-29.7644	25.419	1413	1.854	46.825	5.603	2.977	68.191	17.144	19.001	22.909	53.756	0.63	85.36	1.56	No	Jagersfontein
SA13-1	a4	-29.7644	25.419	1413	1.983	46.478	9.165	5.127	87.105	21.305	25.597	16.989	65.308	0.627	104.1	1.96	No	Jagersfontein
SA13-1	a1	-29.7644	25.419	1413	1.289	40.366	8.548	4.843	128.527	26.027	35.047	26.539	44.53	0.576	77.3	1.82	No	Jagersfontein
SA13-1	a3	-29.7644	25.419	1413	1.024	37.638	10.527	9.381	127.796	26.979	39.413	13.623	48.821	0.577	84.54	1.46	No	Jagersfontein
SA13-1	ma4	-29.7644	25.419	1413	1.86901	42.231	15.3025	22.9809	147.736	54.3477	57.6989	6.42864	48.4333	0.658841	73.5128	3.71099	No	Jagersfontein
SA13-1	ma2	-29.7644	25.419	1413	1.17529	37.5442	25.9156	10.3329	258.455	56.0066	71.0698	25.0129	66.5073	0.606898	109.586	6.2862	No	Jagersfontein
SA13-1	ma3	-29.7644	25.419	1413	1.27768	36.9763	29.2237	18.8848	377.973	65.4114	107.708	20.0147	49.5983	0.597328	83.0337	2.95988	No	Jagersfontein
SA13-34	a6	-28.752	24.7987	1213	2.08568	47.4811	2.77552	3.44174	21.177	19.6325	8.41834	6.15298	59.5079	0.661072	90.0172	26.3522	No	Dutoitspan
SA13-34	a8	-28.752	24.7987	1213	1.12437	40.0789	2.62788	2.14606	32.6172	13.0699	9.81109	15.1987	48.6937	0.605641	80.4002	34.6754	No	Dutoitspan
SA13-34	a9	-28.752	24.7987	1213	1.08673	40.1861	3.18772	4.12042	37.7444	12.0272	12.9903	9.16032	44.7994	0.622747	71.9385	24.9435	No	Dutoitspan
SA13-34	a5	-28.752	24.7987	1213	1.164	40.149	7.512	12.718	54.696	44.766	25.572	4.301	53.319	0.616	86.54	1.96	No	Dutoitspan
SA13-34	a4	-28.752	24.7987	1213	1.823	42.716	16.28	18.324	249.547	15.431	76.968	13.618	38.829	0.598	64.93	0.88	No	Dutoitspan
SA13-48	a1	-28.7697	24.8298	500	1.45	43.64	3.239	5.78	32.4	17.1	13.4	5.602	44.05	0.644	68.4	6.1	Yes	Wesselton
SA13-48	ma3	-28.7697	24.8298	500	1.43	50	4.974	12.556	14.827	37.826	16.041	1.181	56.113	0.746	75.22	2.7	Yes	Wesselton
SA13-48	ma6	-28.7697	24.8298	500	1.14016	38.547	5.02915	12.4983	19.4376	46.3293	17.0661	1.55522	53.165	0.621882	85.4905	21.5926	Yes	Wesselton
SA13-48	ma5	-28.7697	24.8298	500	1.34908	40.0313	6.72784	23.0599	1.55429	16.5453	23.4252	0.0674023	52.7624	0.628964	83.8879	13.5248	Yes	Wesselton
SA13-48	a3	-28.7697	24.8298	500	2.66	50.82	8.063	22.58	6.85	6.2	24.2	0.304	61.4	0.7	87.74	9.92	Yes	Wesselton
SA13-48	ma4	-28.7697	24.8298	500	1.9925	44.3785	8.82935	27.6048	12.0012	28.895	30.4251	0.43475	53.1751	0.655174	81.1617	7.31367	Yes	Wesselton
SA13-48	ma7	-28.7697	24.8298	500	1.88859	44.6384	16.8454	54.3539	6.14865	22.5418	55.7988	0.113123	55.5799	0.655722	84.7613	4.48991	Yes	Wesselton
SA13-13	a6	-29.2816	18.7081	831	1.57217	39.6994	0.0322799	4.22616	3.35167	25.9503	5.01381	0.793078	32.4023	0.653385	48.851	3.57987	Yes	Hoedkop
SA13-13	a2	-29.2816	18.7081	831	1.16086	36.3404	0.0559111	4.53736	13.8355	46.9617	7.78871	3.04924	48.4485	0.596025	79.2988	21.5442	Yes	Hoedkop
SA13-13	a10	-29.2816	18.7081	831	1.01764	34.5364	0.0873611	11.7243	26.4862	5.34722	17.9486	2.25908	39.2758	0.59547	65.8264	2.35191	Yes	Hoedkop
SA11-16	a3	-28.8108	27.4219	1629	4.598	63.708	1.086	6.646	1.169	30.916	6.921	0.176	28.015	0.746	37.56	1.56	No	Monastery
SA11-16	a1	-28.8108	27.4219	1629	1.947	45.505	1.476	6.868	1.7	54.229	7.267	0.248	35.392	0.652	54.29	1.94	No	Monastery
SA11-16	a4	-28.8108	27.4219	1629	3.542	57.82	2.988	10.444	1.354	35.113	10.762	0.13	49.967	0.722	69.21	2.22	No	Monastery
SA11-16	a5	-28.8108	27.4219	1629	1.298	41.917	1.401	11.322	1.766	44.79	11.737	0.156	21.44	0.629	34.09	1.34	No	Monastery
SA11-16	a3	-28.8108	27.4219	1629	3.328	56.186	1.078	10.023	21.937	36.628	15.178	2.189	12.868	0.719	17.89	0.22	No	Monastery
SA11-16	a2	-28.8108	27.4219	1629	1.987	46.475	3.359	16.117	5.19	60.167	17.336	0.322	34.853	0.658	52.95	1.62	No	Monastery
SA11-33	a1	-31.4974	22.7458	1342	2.6	43	3.8	5.1	10.5	68.8	7.6	2.05526	58	0.7	82	7	No	Melton Wold
SA11-33	a3	-31.4974	22.7458	1342	5.4	61	5	6.9	19.9	66.2	11.6	2.88403	67	0.77	86	5.6	No	Melton Wold
SA11-33	a2	-31.4974	22.7458	1342	1.7	40	5.3	6.6	25.9	84.6	12.7	3.93347	60	0.66	91	7.8	No	Melton Wold
SA11-58	a3	-28.3094	26.7969	1416	3.41	56.9	2.455	3.16	16.6	0	7.1	5.24865	63.92	0.715	89.36	1.66	No	Star
SA11-58	a2	-28.3094	26.7969	1416	5.1	67.26	5.471	9.94	7.38	0	11.7	0.742269	86.3	0.776	111.22	1.6	No	Star
SA11-58	a4	-28.3094	26.7969	1416	13.02	90.11	4.246	10.28	12.44	0	13.2	1.21039	59.31	0.828	71.65	0.82	No	Star
SA11-58	a1	-28.3094	26.7969	1416	4.18	60.74	5.422	10.98	10.32	0	13.4	0.939667	74.49	0.744	100.07	1.28	No	Star
SA11-58	a5	-28.3094	26.7969	1416	6.6	72.25	6.388	13.99	11.93	0	16.8	0.852577	70.11	0.77	91.04	1.44	No	Star
SA12-10	a7	-28.5068	25.4958	1263	1.35	41.1	2.282	2.39	25.13	17.12	8.3	10.515	49.75	0.61	81.59	2.16	No	New Elands
SA12-10	a11	-28.5068	25.4958	1263	4.84	62.91	3.518	6.04	32.12	9.56	13.6	5.317	47.38	0.739	64.12	1.74	No	New Elands
SA12-10	a2	-28.5068	25.4958	1263	0.83	35.94	2.646	7.34	29.5	12.92	14.3	4.018	33.92	0.581	58.41	5.32	No	New Elands
SA12-10	a1	-28.5068	25.4958	1263	1.36	42.61	3.639	6.4	37	33.96	15.1	5.782	43.58	0.637	68.41	3.54	No	New Elands
SA12-10	ma2	-28.5068	25.4958	1263	1.888	50	23.216	26.298	223.825	69.06	78.897	8.511	53.728	0.688	78.09	1.86	No	New Elands
SA12-10	ma1	-28.5068	25.4958	1263	1.313	50	19.706	35.861	264.63	55.988	98.049	7.379	36.826	0.616	59.81	1.08	No	New Elands
SA13-17	a5	-28.5048	19.6582	560	1.38994	43.6939	0.301307	21.8277	32.3751	23.0896	29.4359	1.48321	60.1828	0.635779	94.6599	3.21544	NA	Stolzenfels-Wes
SA13-17	a4	-28.5048	19.6582	560	3.16469	55.9166	1.40375	41.5089	15.6193	7.88821	45.1795	0.376288	80.5861	0.715181	112.679	2.37937	NA	Stolzenfels-Wes
SA13-17	a2	-28.5048	19.6582	560	1.66872	44.755	0.830915	58.9645	15.3171	50.8608	62.564	0.259767	65.0852	0.66816	97.4096	3.29129	NA	Stolzenfels-Wes
SA13-17	a6	-28.5048	19.6582	560	1.08831	39.0499	0.849675	86.8874	21.9646	64.6878	92.0491	0.252794	69.3969	0.625681	110.914	3.26047	NA	Stolzenfels-Wes
SA13-17	a1	-28.5048	19.6582	560	2.54996	52.1606	2.45446	84.1296	40.3743	49.3916	93.6176	0.479906	84.115	0.692105	121.535	2.79903	NA	Stolzenfels-Wes
SA13-21	a1	-28.5529	19.8073	636	3.47837	53.1484	0.928745	12.4191	58.423	20.3885	26.1485	4.70428	83.1907	0.71564	115.765	5.07554	NA	Schuitdrift
SA13-21	a7	-28.5529	19.8073	636	0.780315	35.92	0.176093	25.6694	35.8628	8.1854	34.0972	1.3971	54.3559	0.610544	88.6539	1.49661	NA	Schuitdrift
SA13-21	a2	-28.5529	19.8073	636	1.35714	38.9909	0.649144	46.5219	14.3467	36.7825	49.8934	0.308386	78.3498	0.644656	120.752	5.2563	NA	Schuitdrift
SA13-33	a1	-28.1528	22.9182	1280	1.34	41.17	6.408	9.13	37.94	31.29	18	4.157	64.43	0.621	103.8	7.12	NA	Makganyene
SA13-33	a6	-28.1528	22.9182	1280	5.48	68.421	6.818	3.046	82.105	10.542	22.341	26.953	55.818	0.757	73.71	1.12	NA	Makganyene
SA13-33	a3	-28.1528	22.9182	1280	1.87	47.19	9.576	18.1	35.69	23.49	26.5	1.971	66.11	0.677	97.58	4.88	NA	Makganyene
SA13-33	a5	-28.1528	22.9182	1280	1.11	40.77	30.579	10.77	288.23	29.35	78.5	26.753	71.27	0.607	117.36	3.94	NA	Makganyene
SA13-33	a4	-28.1528	22.9182	1280	1.08	40.08	23.526	30.19	209.84	34.53	79.5	6.95	54.24	0.618	87.78	2.48	NA	Makganyene
SA13-33	a2	-28.1528	22.9182	1280	1.01	36.84	37.033	33.26	306.11	29.77	105.2	9.204	64.55	0.571	113.05	2.58	NA	Makganyene
SA11-13	a1	-28.8171	24.719	1237	6.12	66.9	2.53	6.79	18.7	0	11.2	2.75313	41.72	0.743	56.12	0.98	Yes	Wimbledon
SA11-13	a2	-28.8171	24.719	1237	2.47	52.84	3.2	4.6	41.7	0	14.4	9.05879	40.88	0.7	58.37	0.92	Yes	Wimbledon
SA11-13	a5	-28.8171	24.719	1237	6.318	67.372	5.929	7.982	28.388	9.856	14.653	3.557	74.018	0.756	97.91	1.64	Yes	Wimbledon
SA11-13	a2	-28.8171	24.719	1237	0.843	36.818	5.483	5.592	41.954	43.02	15.451	7.503	63.788	0.588	108.53	0.86	Yes	Wimbledon
SA11-13	a3	-28.8171	24.719	1237	3.51	58.98	4.547	10.09	28.5	0	16.8	2.82484	49.92	0.738	67.65	1.02	Yes	Wimbledon
SA11-13	a4	-28.8171	24.719	1237	1.18	36.64	12.556	14.64	83.18	0	34.2	5.68269	67.54	0.568	118.89	0.96	Yes	Wimbledon
SA11-27	a4	-30.8255	22.5364	1300	10	86	0.2	0.2	1	10.9	0.4	5.51031	63	0.82	77	12.8	Yes	Uintjiesberg
SA11-27	a2	-30.8255	22.5364	1300	36.1	132	0.4	0.1	1.3	10.8	0.5	10.1014	63	0.88	72	6.2	Yes	Uintjiesberg
SA11-27	a4	-30.8255	22.5364	1300	2	50	22.8	60.5	0	0.8	60.5	0	60	0.71	96	1.2	Yes	Uintjiesberg
SA11-27	a3	-30.8255	22.5364	1300	1.2	41	22.6	63.5	0	1.6	63.5	0	56	0.65	99	1	Yes	Uintjiesberg
SA11-57	a3	-30.25	22.3567	1026	1.1	39	1	8.4	0	1.8	8.4	0	22	0.59	36	0.2	Yes	Markt
SA11-57	a4	-30.25	22.3567	1026	2.6	54	2.7	10.5	0	1.3	10.5	0	45	0.73	63	0.6	Yes	Markt
SA11-57	a2	-30.25	22.3567	1026	2.5	52	2.2	10.9	0	0.9	10.9	0	35	0.69	50	0.4	Yes	Markt
SA11-57	a5	-30.25	22.3567	1026	1.5	44	2.7	16	0	1.9	16	0	31	0.66	47	0.4	Yes	Markt
SA11-57	a3	-30.25	22.3567	1026	8.3	89	15.1	21.2	7.7	16.7	23	0.36433	62	0.82	75	3.8	Yes	Markt
SA11-57	a2	-30.25	22.3567	1026	7.2	75	19.9	32.3	22.7	98.4	37.6	0.704062	79	0.8	99	4.8	Yes	Markt
SA11-57	a4	-30.25	22.3567	1026	7.4	79	33.1	37.9	37.2	125.2	46.7	0.979809	83	0.81	102	5.2	Yes	Markt
SA11-57	a1	-30.25	22.3567	1026	7.3	75	35.6	70.4	24.5	15.7	76.1	0.347509	70	0.81	87	4	Yes	Markt
SA12-20	a1	-28.7912	28.199	1662	0.88	37.99	1.467	3.67	19.45	57.22	8.2	5.304	31.04	0.606	51.22	2.58	Yes	Koenaneng
SA12-20	a2	-28.7912	28.199	1662	1.27	42.84	2.661	11.26	4.41	9.92	12.3	0.392	39.76	0.669	59.4	4.44	Yes	Koenaneng
SA12-20	a7	-28.7912	28.199	1662	0.85	38.06	3.446	9.46	14.41	27.51	12.8	1.523	48.64	0.628	77.51	1.6	Yes	Koenaneng
SA12-20	a2	-28.7912	28.199	1662	1.14	40.83	3.811	4.98	37.58	46.19	13.8	7.548	49.42	0.627	78.87	3.18	Yes	Koenaneng
SA12-20	a6	-28.7912	28.199	1662	2.03	48.66	7.4	18	18.74	51.68	22.4	1.041	59.79	0.715	83.65	2.66	Yes	Koenaneng
SA12-20	a8	-28.7912	28.199	1662	1.09	40.99	7.857	23.87	12.47	22.38	26.8	0.523	53.77	0.659	81.57	1.56	Yes	Koenaneng
SA12-20	a1	-28.7912	28.199	1662	2.33	51.69	12.833	29.87	25.46	45.94	35.9	0.852	65.3	0.715	91.37	3.42	Yes	Koenaneng
SA12-20	a4	-28.7912	28.199	1662	2.44	52.8	14.977	46.83	35.33	69.41	55.1	0.754	49.65	0.719	69.01	2.22	Yes	Koenaneng
SA12-20	a9	-28.7912	28.199	1662	3.22	58.9	44.972	36.81	353.47	30.47	119.9	9.604	68.79	0.732	94.02	1.46	Yes	Koenaneng
SA12-20	a3	-28.7912	28.199	1662	2.06	50.49	55.744	107.39	237.41	75.6	163.2	2.211	62.69	0.709	88.39	1.84	Yes	Koenaneng
SA12-6	a3	-28.3506	24.3981	1036	1.553	42.273	2.199	5.456	13.243	19.079	8.568	2.427	46.475	0.614	75.7	0.88	Yes	Newlands
SA12-6	a1	-28.3506	24.3981	1036	6.167	69.552	4.724	7.253	27.445	6.853	13.703	3.784	63.186	0.774	81.66	1.7	Yes	Newlands
SA12-6	a5	-28.3506	24.3981	1036	4.74	65.531	7.92	16.987	14.353	4.378	20.36	0.845	71.561	0.772	92.66	1.38	Yes	Newlands
SA12-6	a4	-28.3506	24.3981	1036	2.764	54.492	11.795	4.498	94.682	11.444	26.748	21.051	80.633	0.699	115.4	4.02	Yes	Newlands
SA12-6	a1	-28.3506	24.3981	1036	1.504	43.664	19.088	5.112	142.344	15.79	38.563	27.847	90.478	0.63	143.64	3.42	Yes	Newlands
SA13-30	a4	-26.7433	20.0371	835	0.737645	34.6598	0.0172142	6.64462	3.35051	3.93746	7.43198	0.504244	25.8168	0.604054	42.5692	19.6763	Yes	Rietfontein
SA13-30	a1	-26.7433	20.0371	835	0.804731	34.6284	0.0397329	6.38166	18.0109	52.2947	10.6142	2.82229	36.7939	0.581681	61.899	17.304	Yes	Rietfontein
SA13-30	a3	-26.7433	20.0371	835	1.06691	37.7201	0.0864397	7.99633	28.5872	58.3434	14.7143	3.57504	43.8458	0.610372	70.6726	11.463	Yes	Rietfontein
SA13-30	a5	-26.7433	20.0371	835	0.937217	34.9062	0.0826125	8.86856	45.3965	50.3645	19.5367	5.11881	36.3182	0.572914	62.5715	8.30607	Yes	Rietfontein
SA13-30	a6	-26.7433	20.0371	835	0.760115	35.704	0.0826311	10.0297	41.479	71.858	19.7773	4.1356	43.8737	0.594548	72.6173	11.8702	Yes	Rietfontein
a - Prefix a denotes single apatite aliquot, ma denotes multi grain apatite aliquot, z is zircon.
b - Rs is the radius of a sphere with an equivalent alpha ejection correction as the grain, calculated using equation A6 in Cooperdock et al., (2019)
c - Mass is the mass of the crystal. Determined from the measured grain dimensions, the volume assuming the reported grain geometry, and the volume equations and mineral densities in Ketcham et al. (2011).
d - Blank-corrected 4He
e - Concentrations of U, Th and Sm computed from their absolute amounts and the estimated dimensional mass
f - eU is effective uranium concentration. Calculated as U + 0.238*Th + 0.0012*Sm after Cooperdock et al., (2019)
g - Uncorrected date is calculated iteratavely using the 4He production equation defined as equation 1 in Wolf et al. (1998) and assuming secular equilibrium.
h - The combined alpha-ejection correction for the crystal calculated from the isotope specific FT and assuming homogeneous parent isotope distributions.
i - The corrected date is calculated iteratively using the absolute values of He, U, Th and Sm, the isotope specific FT corrections, and equation 34 in Ketcham at al., (2011) assuming secular equilibrium.
j - 2s propagated analytical uncertainty on the U, Th, Sm, and He measurements
k - whether or not sample appears to have a correlation between AHe date and eU concentration (see figs S1 and S2)
